# Supplementary material
Source: PubMed Central journal article supplement (PMC6186509)
Supplement: NIHMS960096-supplement-3.pdf [file NIHMS960096-supplement-3.pdf]

Supplementary Text

**Supplemental Figure 1:**

TEM images of MSN-HA-siTWIST nanoparticles. Size of primary particles was not altered.

**Supplemental Figure 2:**

Flow Cytometry analysis evaluating cellular uptake of MSN-HA vs. MSN only nanoparticles. Experimentation was conducted with Ovar8 cells including an untreated control at of 1, 2 and 4 hour time points. Merge image of 4 hr time point compares uptake capacity of MSN-HA to MSN's alone.
